# Supplementary material for: Sepiolite based materials for storage and slow release of nitric oxide
Source: Royal Society of Chemistry journal article supplement (doi:10.1039/c3nj00452j), 2013-01-01
Supplement: c3nj00452j.pdf [file c3nj00452j.pdf]

# **ELECTRONIC SUPPORTING INFORMATION**

## **Sepiolite based materials for storage and slow release of nitric oxide**

Ana C. Fernandes, Fernando Antunes, João Pires\*

CQB and Department of Chemistry and Biochemistry, Faculty of Sciences, Building  
C8, University of Lisbon, Campo Grande, 1749-016 Lisbon, Portugal  
Telephone: (351) 217500903 – Fax: (351) 217500088 – e-mail: [jpsilva@fc.ul.pt](mailto:jpsilva@fc.ul.pt)

\* corresponding author

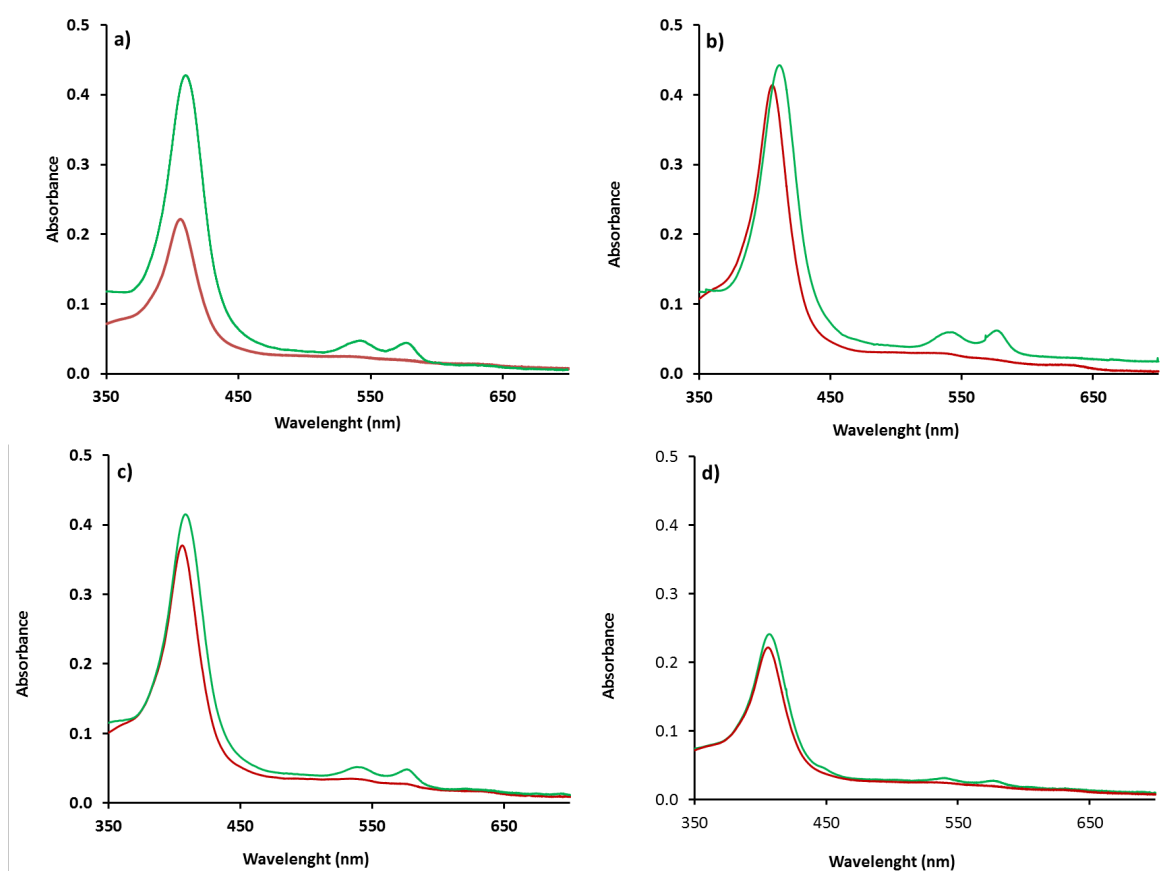

**Figure S1.** UV-Vis spectra for the transformation of oxyhemoglobin in methemoglobin due to NO release. a) Sepiolite, b) ALS-P, c) TiCoS-P, d) TiZnS-P

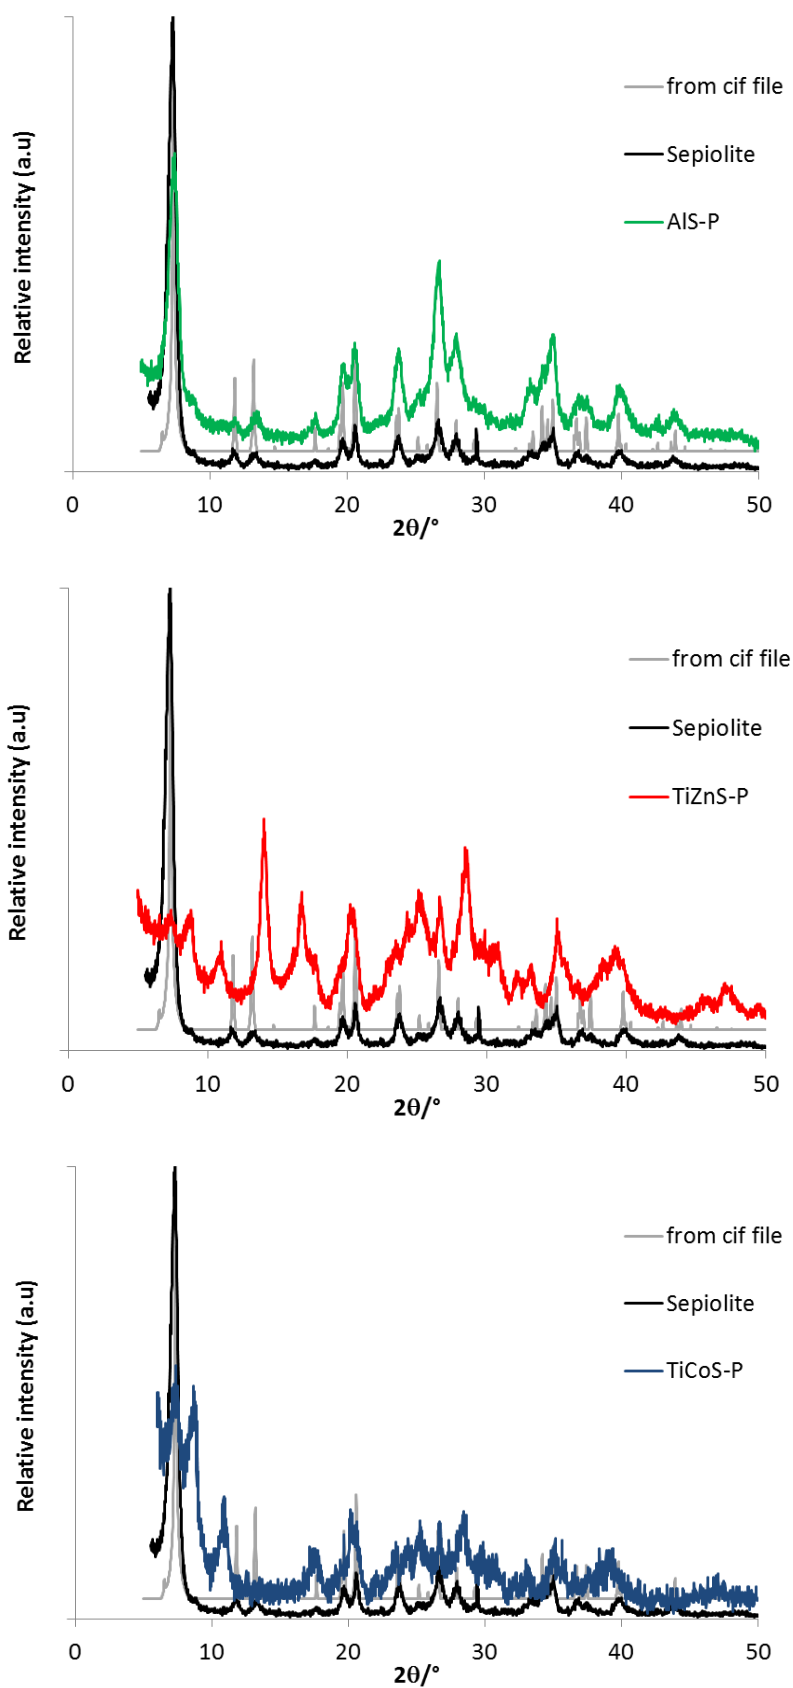

**Figure S2.** Powder X-ray diffractograms of the indicated samples, compared with the data from the cif file (J. E. Post, D. L. Bish, P. J. Heanwy *American Mineralogist*, Volume 92, pages 91–97, 2007)
